# Supplementary material
Source: Research Square preprint supplement (doi:10.21203/rs.3.rs-10000496/v1)

**Groundnut genotypes studied**


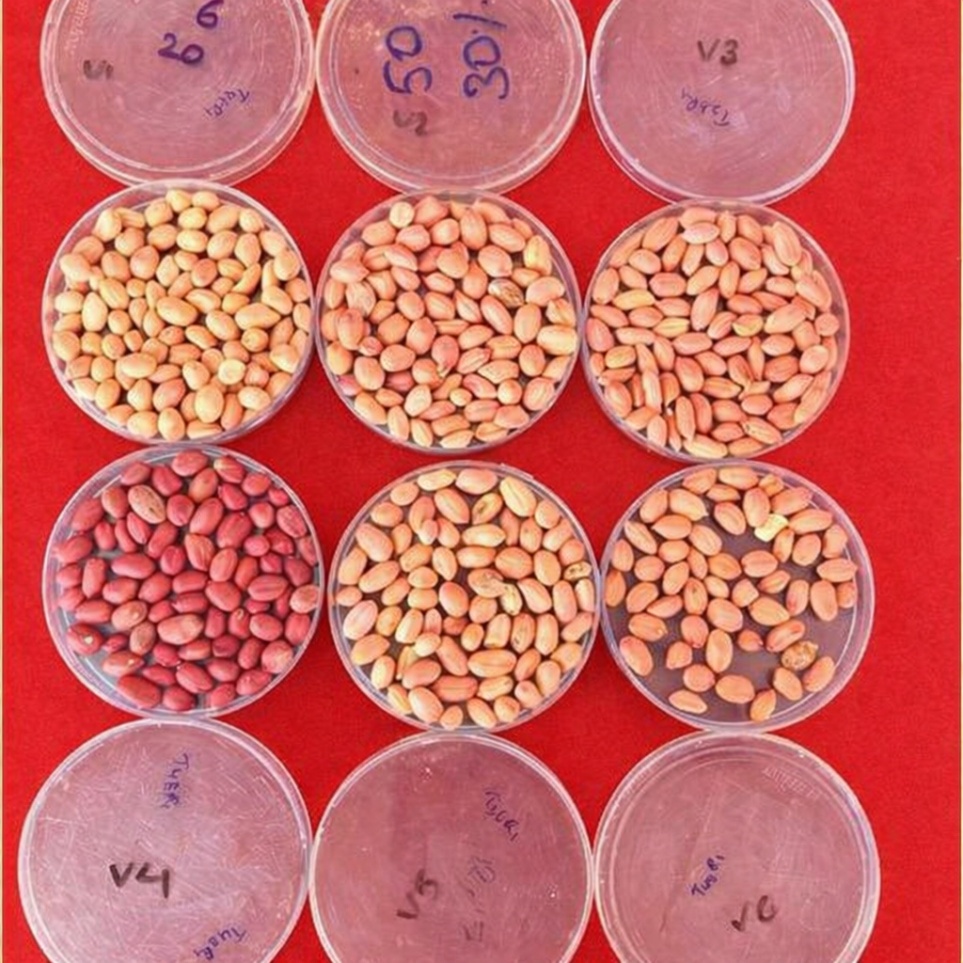


Trend of Phenols content (mg GAE/g FW) of Groundnut Genotypes during pre & post harvest conditions

Photographs displaying performing analysis under laboratory conditions


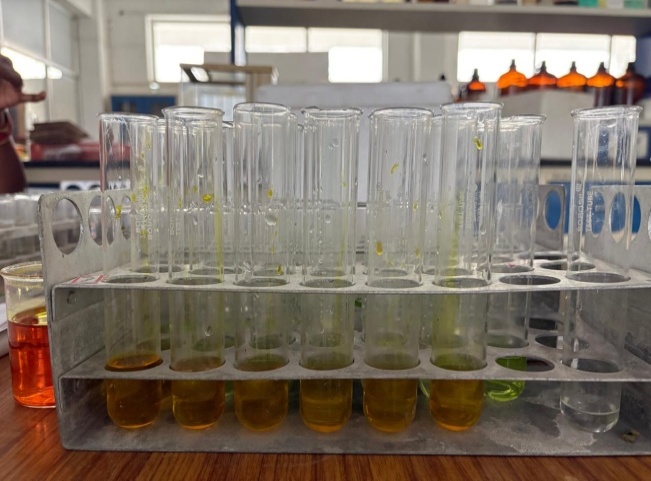

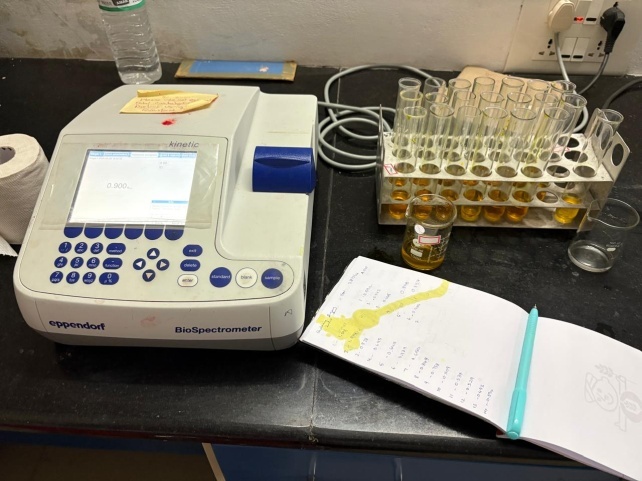

Supplement: Supplementary file 1 [file 0b5a72ea8e158d6e660b4643.docx]
